# Supplementary material
Source: publisher site journal article supplement (https://www.spandidos-publications.com/22/downloadSupplementary)
Supplement: Supplementary file 1 [file downloadSupplementary]

## Sheet: clustered peaks
Table SIII. CM10 and IMAC30 clustered peak table. Clustered peaks observed on the CM10 and IMAC30 chip-type and using clustering parameters as detailed in the Material and Methods section from 83 samples were exported. The table includes peak-associated p-values, m/z peaks (reference value, mean value, standard deviation (STD) and % covariance), intensity values (mean value, standard deviation (S…
chip type	p-Value	m/z	m/z mean	m/z median	m/z STD	m/z % CV	Intensity mean	Intensity median	Intensity STD	Intensity % CV	number of peaks
CM10	0.183869	1507.55	1507.54	1507.67	1.63723	0.108603	38.1739	31.6975	29.3805	76.965	58
CM10	0.239388	1529.14	1528.78	1528.54	0.909056	0.059463	29.0578	20.0821	37.9618	130.642	18
CM10	NaN	1543.71	1543.71	1543.71	NaN	NaN	28.1994	28.1994	NaN	NaN	1
CM10	0.520265	1547.56	1547.5	1547.33	0.923977	0.0597078	17.5085	15.8477	6.1645	35.2086	17
CM10	0.317311	1551.2	1550.6	1550.6	0.861308	0.0555469	101.791	101.791	120.021	117.91	2
CM10	0.220671	1574.11	1574.01	1574.11	0.556628	0.0353636	52.2503	8.90797	78.2906	149.837	3
CM10	0.860708	1685.35	1685.32	1685.29	1.50679	0.0894068	20.3285	20.5592	6.40578	31.5114	4
CM10	0.920626	1733.86	1730.98	1730.43	2.85875	0.165152	28.0293	26.5045	14.9155	53.214	57
CM10	0.684587	1754.42	1753	1752.74	2.31479	0.132048	28.8121	23.5713	21.2438	73.7321	54
CM10	0.322868	1769.14	1769.49	1769.36	1.8024	0.10186	24.5061	21.7288	11.196	45.6863	14
CM10	NaN	1912.05	1912.05	1912.05	NaN	NaN	12.0345	12.0345	NaN	NaN	1
CM10	NaN	1933.2	1933.2	1933.2	NaN	NaN	3.84622	3.84622	NaN	NaN	1
CM10	0.0271777	1954.32	1954.47	1954.55	2.26264	0.115767	16.7265	13.3158	7.79779	46.6194	13
CM10	0.768384	1977.43	1976.98	1976.7	2.71825	0.137495	18.6417	14.7774	11.3704	60.9942	16
CM10	0.726793	1996.56	1995.34	1994.25	4.17498	0.209237	17.6631	15.061	11.4225	64.6687	56
CM10	0.117319	2017.03	2017.35	2017.25	1.84965	0.0916875	44.8968	33.0796	32.7244	72.888	6
CM10	NaN	2023.93	2023.93	2023.93	NaN	NaN	8.16134	8.16134	NaN	NaN	1
CM10	NaN	2099.54	2100.12	2100.12	0.821278	0.0391062	12.2929	12.2929	1.70204	13.8457	2
CM10	NaN	2193.78	2193.78	2193.78	NaN	NaN	11.3675	11.3675	NaN	NaN	1
CM10	0.662445	2203.66	2201.71	2201.37	1.79736	0.0816348	45.0195	28.8871	39.9587	88.7587	59
CM10	0.844603	2222.28	2221.14	2221.54	4.10636	0.184877	13.7574	13.2142	7.1464	51.9459	9
CM10	0.397266	2240.07	2239.57	2239.58	3.0093	0.13437	23.3301	17.2977	18.6864	80.0954	10
CM10	0.40657	2254.66	2254.95	2254.66	1.00001	0.0443475	10.4844	7.62547	6.14411	58.6026	4
CM10	NaN	2291.23	2291.23	2291.23	NaN	NaN	16.667	16.667	NaN	NaN	1
CM10	NaN	2324.65	2323.99	2323.99	0.935485	0.0402533	6.25873	6.25873	4.4894	71.7301	2
CM10	0.299781	2342.86	2343.02	2343.51	1.53197	0.0653843	18.0248	16.1486	13.5062	74.9307	6
CM10	0.20772	2385.78	2385.53	2385.71	1.41613	0.0593634	12.7305	11.557	5.23044	41.086	39
CM10	0.0105595	2447.38	2445.77	2445.94	2.28112	0.093268	45.7989	27.361	49.2655	107.569	62
CM10	NaN	2463.42	2463.42	2463.42	NaN	NaN	6.47665	6.47665	NaN	NaN	1
CM10	0.930916	2478.4	2478.24	2477.85	2.39111	0.0964842	11.8415	11.9797	5.59307	47.2327	8
CM10	0.25924	2488.13	2488.18	2487.69	1.54173	0.061962	8.97414	8.80446	2.64728	29.499	4
CM10	1	2501.04	2500.76	2500.61	0.645712	0.0258206	20.6761	16.7478	14.772	71.4446	3
CM10	0.798516	2544.27	2543.77	2543.17	2.23329	0.0877946	11.1251	10.5294	4.99781	44.9238	8
CM10	0.595595	2578.52	2581.76	2582.55	3.13931	0.121596	14.0319	9.96839	9.9172	70.6763	33
CM10	NaN	2597.68	2597.68	2597.68	NaN	NaN	7.63962	7.63962	NaN	NaN	1
CM10	0.167677	2651.14	2651.57	2651.45	1.48089	0.0558497	12.3064	12.0768	4.20603	34.1775	6
CM10	0.121335	2671.82	2671.66	2671.82	2.23681	0.0837236	11.6228	11.9349	4.94344	42.5322	4
CM10	0.654721	2684.2	2684.16	2683.85	3.17729	0.118372	10.8165	8.83483	6.41254	59.2851	8
CM10	0.194215	2708.88	2709.41	2709.67	3.28853	0.121375	10.3642	8.26511	5.86201	56.5605	9
CM10	0.0774041	2766.31	2765.1	2764.35	2.47779	0.0896093	17.1465	12.5998	14.9904	87.4251	14
CM10	0.188309	2802.49	2801.27	2800.78	2.01817	0.0720448	81.3386	62.8857	87.3056	107.336	63
CM10	NaN	2825.72	2825.72	2825.72	NaN	NaN	2.87872	2.87872	NaN	NaN	1
CM10	0.344154	2926.67	2925.48	2925.55	3.73134	0.127546	11.3789	9.85053	4.30083	37.7965	5
CM10	0.129991	2954.6	2953.49	2953.47	3.89633	0.131923	7.81093	6.92748	4.05729	51.9438	24
CM10	0.490537	3005.81	3005.82	3005.96	2.08782	0.0694593	11.6929	9.55432	6.92248	59.2027	30
CM10	0.311731	3031.71	3031.63	3032.51	3.62177	0.119466	12.6225	9.92567	8.79882	69.7076	12
CM10	0.0316766	3101.32	3101.45	3100.98	2.31935	0.0747829	7.45674	6.73112	2.75919	37.0026	23
CM10	NaN	3166.37	3166.37	3166.37	NaN	NaN	8.06206	8.06206	NaN	NaN	1
CM10	0.179713	3174.04	3174.93	3174.7	1.56899	0.0494181	9.35831	9.73959	6.235	66.6253	4
CM10	0.367879	3208.16	3208.62	3208.16	1.29613	0.0403952	6.33492	4.39266	4.36718	68.9383	3
CM10	NaN	3226.96	3226.76	3226.96	1.66312	0.0515415	7.99436	5.99377	5.59526	69.99	5
CM10	0.317311	3249.37	3248.22	3248.22	1.62941	0.050163	3.04148	3.04148	1.91605	62.9974	2
CM10	0.317311	3343.51	3343.69	3343.69	0.260832	0.00780073	6.58189	6.58189	3.86062	58.6552	2
CM10	0.528338	3360.52	3360.61	3360.51	2.57998	0.0767713	24.7363	11.5627	26.8245	108.442	30
CM10	0.597324	3380.96	3382.7	3383.18	4.00996	0.118543	42.5727	10.5682	73.5515	172.767	25
CM10	NaN	3403.16	3403.16	3403.16	NaN	NaN	13.9936	13.9936	NaN	NaN	1
CM10	0.317311	3416.35	3416.35	3416.35	0.491534	0.0143877	83.9315	83.9315	9.82542	11.7065	2
CM10	0.942374	3454.61	3456.08	3456.43	3.00513	0.0869519	61.1004	10.6338	115.642	189.266	24
CM10	0.500292	3484.03	3479.2	3474.47	11.0523	0.317667	32.5833	12.8139	57.0543	175.103	45
CM10	0.317311	3533.56	3533.56	3533.56	1.63855	0.046371	18.2313	18.2313	3.2085	17.5988	2
CM10	NaN	3543.54	3543.54	3543.54	1.9604	0.0553232	8.13899	8.13899	3.027	37.1914	2
CM10	0.455552	3590.56	3589.73	3589.17	2.72973	0.0760427	22.4896	11.3592	31.8832	141.769	50
CM10	0.317311	3625.6	3624.37	3624.37	1.73198	0.0477869	7.32447	7.32447	0.19626	2.67951	2
CM10	NaN	3633.38	3633.38	3633.38	NaN	NaN	40.2902	40.2902	NaN	NaN	1
CM10	0.4679	3722.3	3720.14	3719.29	3.75403	0.100911	27.9889	18.3546	30.9365	110.531	45
CM10	0.765017	3744.66	3745.1	3744.88	1.24772	0.033316	18.3513	17.0526	8.45532	46.0747	7
CM10	NaN	3760.2	3760.2	3760.2	NaN	NaN	12.207	12.207	NaN	NaN	1
CM10	0.317311	3778.08	3779.31	3779.31	1.73337	0.0458648	10.085	10.085	5.30356	52.5888	2
CM10	0.649907	3817.93	3818.1	3818.15	2.19927	0.0576011	21.6772	10.2353	33.6884	155.41	13
CM10	NaN	3829.5	3827.93	3827.93	2.21684	0.0579123	10.662	10.662	4.33688	40.676	2
CM10	0.22313	3852.15	3853.1	3853.62	2.17882	0.0565472	17.4766	8.43179	16.7766	95.9949	5
CM10	0.317311	3862.49	3860.79	3860.79	2.4053	0.0623006	5.87367	5.87367	1.07979	18.3835	2
CM10	NaN	3883.38	3883.38	3883.38	NaN	NaN	31.2364	31.2364	NaN	NaN	1
CM10	0.304284	3905.3	3904.21	3903.39	2.26787	0.0580878	40.4843	27.7037	38.0325	93.944	22
CM10	0.66272	3933.25	3937.6	3939.74	5.20524	0.132193	17.5136	10.646	16.4268	93.7944	24
CM10	0.317311	3953.21	3953.21	3953.21	2.79083	0.0705964	9.25164	9.25164	3.67981	39.7747	2
CM10	0.755082	4037.3	4034.4	4033.4	5.07298	0.125743	12.9264	11.6086	11.2112	86.7309	42
CM10	0.546415	4065.01	4062.31	4060.63	3.61364	0.0889553	23.9485	14.6286	34.1077	142.421	10
CM10	0.367879	4087.09	4087.06	4087.02	0.534331	0.0130737	15.0681	14.3439	3.32946	22.096	3
CM10	NaN	4113.96	4113.96	4113.96	NaN	NaN	22.4283	22.4283	NaN	NaN	1
CM10	0.0175069	4146.61	4144.67	4142.33	5.79977	0.139933	18.8368	17.1254	11.1264	59.0671	23
CM10	0.485091	4211.79	4209.6	4208.73	3.50566	0.0832776	27.8668	21.3027	28.2947	101.535	23
CM10	0.281585	4254.75	4255.32	4254.61	3.0759	0.0722836	9.8634	10.9856	4.34951	44.0975	16
CM10	0.62421	4311.81	4312.65	4313.16	3.93212	0.0911764	18.065	15.0114	9.15005	50.6506	11
CM10	NaN	4329.29	4329.29	4329.29	NaN	NaN	56.3064	56.3064	NaN	NaN	1
CM10	0.708325	4376.6	4377.83	4378.68	3.70179	0.0845575	75.3565	53.9763	53.5122	71.0121	80
CM10	0.317311	4422.93	4422.99	4422.99	0.0895834	0.0020254	26.5856	26.5856	1.40947	5.30162	2
CM10	0.317311	4439.7	4439.18	4439.18	0.734457	0.0165449	8.35292	8.35292	1.23151	14.7435	2
CM10	0.136351	4489.19	4491.52	4491.73	3.32469	0.0740215	27.5507	21.7715	19.377	70.3321	54
CM10	NaN	4520.81	4520.81	4520.81	NaN	NaN	15.5071	15.5071	NaN	NaN	1
CM10	0.403005	4555.41	4551.76	4551.42	2.4959	0.0548338	39.5474	25.5253	39.6655	100.299	59
CM10	0.426446	4585.09	4585.14	4584.6	1.67948	0.0366288	25.2991	21.1949	14.2214	56.213	25
CM10	0.319649	4645.37	4644.14	4643.3	6.09136	0.131162	39.4933	26.1083	37.6775	95.4024	53
CM10	0.812772	4698.93	4698.66	4698.96	1.7185	0.0365742	25.8953	22.0971	16.1602	62.4059	21
CM10	0.0930013	4767.2	4765.57	4765.1	2.20268	0.0462207	277.227	251.532	194.941	70.3181	80
CM10	0.0268081	4908.07	4909.01	4911.31	5.73987	0.116925	17.044	17.1174	5.68065	33.3293	17
CM10	0.253962	4976.17	4975.42	4974.62	5.09867	0.102477	29.5462	27.5655	15.9089	53.8439	68
CM10	NaN	5010.89	5012.97	5012.97	2.9469	0.0587854	12.7365	12.7365	10.7862	84.6874	2
CM10	NaN	5040.07	5040.07	5040.07	NaN	NaN	5.64024	5.64024	NaN	NaN	1
CM10	0.317311	5060.2	5058.55	5058.55	2.34306	0.0463189	10.895	10.895	4.89671	44.9445	2
CM10	0.211611	5084.44	5084.21	5083.95	2.07317	0.0407767	134.07	53.3759	153.326	114.363	22
CM10	0.601139	5122.99	5122.03	5122.99	2.42461	0.0473369	7.15476	6.30529	2.05054	28.6598	7
CM10	0.157299	5190.32	5190.39	5190.65	1.80223	0.0347224	57.7437	15.1661	99.6585	172.588	5
CM10	0.317311	5236.86	5235.93	5235.93	1.31236	0.0250645	9.45986	9.45986	3.51869	37.196	2
CM10	NaN	5263.87	5263.87	5263.87	NaN	NaN	10.5818	10.5818	NaN	NaN	1
CM10	NaN	5277.88	5276.78	5276.78	1.5542	0.0294535	9.02734	9.02734	8.86846	98.24	2
CM10	0.113196	5303.71	5306.49	5310.24	8.34843	0.157325	23.5728	17.0208	23.1066	98.0222	42
CM10	0.317311	5346.87	5347.63	5347.63	1.07659	0.0201321	10.172	10.172	0.465413	4.57545	2
CM10	0.572392	5402.2	5402.44	5401.92	3.05901	0.0566229	19.5551	14.2503	15.4284	78.897	28
CM10	NaN	5441.54	5440.49	5438.82	3.27619	0.0602186	11.6772	12.5954	5.61923	48.1213	3
CM10	NaN	5479.36	5479.36	5479.36	4.18468	0.0763718	15.5544	15.5544	2.50871	16.1286	2
CM10	NaN	5495.46	5495.46	5495.46	2.82066	0.0513271	18.6812	18.6812	2.51337	13.454	2
CM10	0.199938	5524.52	5515.74	5514.65	5.21504	0.0945483	33.1968	20.7472	37.6196	113.323	52
CM10	0.317311	5553.23	5554.18	5554.18	1.34323	0.024184	5.44306	5.44306	4.81277	88.4202	2
CM10	1	5594.71	5594.96	5594.82	0.441151	0.00788479	13.3492	8.27789	12.5347	93.8982	3
CM10	0.177784	5619.57	5617.96	5617.33	5.66696	0.100872	15.0105	13.258	9.19255	61.2407	19
CM10	0.381811	5709.09	5710.53	5711.38	7.31155	0.128036	23.8853	14.4627	26.0591	109.101	41
CM10	NaN	5768.19	5766.54	5766.54	2.33485	0.0404897	6.74862	6.74862	5.49247	81.3866	2
CM10	0.273521	5818.95	5821.2	5820.9	3.24146	0.0556838	19.1693	12.2175	19.9013	103.818	37
CM10	0.25924	5851.55	5850.16	5848.76	5.98693	0.102338	12.1497	13.1947	4.17083	34.3287	4
CM10	0.401876	5885.74	5884.56	5884.29	4.7483	0.0806908	12.0383	7.0295	14.2117	118.054	28
CM10	NaN	5938.99	5938.61	5938.61	0.543461	0.00915132	11.7252	11.7252	3.14475	26.8204	2
CM10	0.665885	5986.66	5987.93	5986.93	3.54139	0.0591422	7.03762	6.29792	3.63329	51.6267	7
CM10	0.317311	6013.08	6014.92	6014.92	2.60459	0.0433022	7.48072	7.48072	2.27678	30.4353	2
CM10	NaN	6030.46	6030.46	6030.46	NaN	NaN	8.71167	8.71167	NaN	NaN	1
CM10	0.317311	6059	6059	6059	3.36751	0.0555786	9.05628	9.05628	2.4729	27.3059	2
CM10	NaN	6125.14	6125.14	6125.14	NaN	NaN	11.6156	11.6156	NaN	NaN	1
CM10	NaN	6176.5	6176.5	6176.5	NaN	NaN	6.3394	6.3394	NaN	NaN	1
CM10	0.749065	6201.92	6200.16	6199.33	4.63866	0.0748152	13.4991	10.9538	10.9927	81.4329	66
CM10	0.194844	6269.34	6274.42	6279.58	11.091	0.176765	8.49429	6.68362	6.05538	71.2877	9
CM10	0.861661	6358.11	6355.83	6354.98	4.26602	0.0671198	6.88169	5.84696	4.35247	63.247	59
CM10	0.304076	6399.62	6400.58	6400	11.1099	0.173577	23.1808	13.409	26.0938	112.566	6
CM10	0.752954	6448.74	6447.46	6447.62	6.87906	0.106694	6.78493	5.01087	4.78921	70.586	28
CM10	0.40657	6565.58	6566.43	6567.29	3.56703	0.0543222	5.08554	5.08837	1.85617	36.499	4
CM10	1	6583.38	6583.55	6583.44	0.301734	0.00458315	10.8541	11.4694	7.74162	71.3245	3
CM10	NaN	6631.95	6631.95	6631.95	NaN	NaN	4.49267	4.49267	NaN	NaN	1
CM10	0.164915	6652.83	6654.1	6653.77	2.21495	0.0332869	3.38855	3.04713	1.46758	43.3099	6
CM10	0.28405	6699.18	6696.51	6694.9	6.38284	0.095316	3.36889	3.10195	2.39752	71.1664	29
CM10	0.317311	6763.32	6763.32	6763.32	0.716455	0.0105932	18.9077	18.9077	1.41462	7.48171	2
CM10	1	6820.92	6819.54	6818.15	5.22107	0.0765605	12.6081	10.2782	8.73765	69.3017	4
CM10	0.317311	6877.41	6874.3	6874.3	4.38957	0.0638547	4.20709	4.20709	0.307316	7.30472	2
CM10	0.220671	6894.23	6893.95	6893.39	1.54241	0.0223733	5.56761	5.65907	1.04441	18.7587	3
CM10	NaN	6913.17	6913.17	6913.17	NaN	NaN	13.0507	13.0507	NaN	NaN	1
CM10	0.860708	6935.25	6935.78	6935.31	3.44634	0.0496893	4.76751	3.39816	4.15301	87.1108	4
CM10	0.220671	6961.87	6960.4	6957.46	5.79417	0.0832448	2.54433	2.41692	0.508456	19.9839	3
CM10	0.488228	6999.39	6998.47	6997.94	3.41717	0.0488275	3.22306	2.65705	1.63191	50.6321	15
CM10	0.220671	7038.18	7037.91	7037.36	3.7856	0.0537887	5.84391	4.31538	3.15768	54.0337	3
CM10	0.299781	7065.05	7066.52	7066.73	4.25232	0.0601756	10.2437	5.96623	10.7793	105.229	6
CM10	0.310883	7098.61	7097.03	7096.75	3.28477	0.0462838	8.87903	5.65083	8.22117	92.5909	23
CM10	NaN	7118.99	7118.99	7118.99	NaN	NaN	19.1995	19.1995	NaN	NaN	1
CM10	0.317311	7133.56	7132.74	7132.74	1.15517	0.0161953	25.5088	25.5088	33.5313	131.45	2
CM10	0.765928	7158.86	7160.6	7161.39	3.57491	0.0499247	3.68148	3.86724	1.5226	41.3584	5
CM10	1	7184.95	7185.07	7186.02	5.81919	0.08099	26.3634	5.78113	40.9226	155.225	5
CM10	0.638897	7273.9	7272.11	7270.02	9.82343	0.135084	8.03194	4.69735	10.8437	135.008	16
CM10	0.516079	7327.57	7325.6	7325.19	3.99607	0.0545493	14.1167	7.25129	15.8748	112.454	42
CM10	0.412643	7371.7	7368.66	7365.66	12.0541	0.163585	9.53715	5.25378	9.96972	104.536	18
CM10	0.317311	7435.98	7436.65	7436.65	0.953599	0.012823	9.13532	9.13532	1.88443	20.628	2
CM10	0.601197	7498.7	7500.75	7495.59	21.3137	0.284154	6.11264	4.89321	5.83678	95.487	45
CM10	0.220671	7569.17	7567.74	7564.88	6.33717	0.0837393	11.2289	14.0736	6.39102	56.916	3
CM10	0.678495	7621.58	7623.7	7624.44	17.2751	0.226597	8.94342	5.64832	8.8856	99.3535	11
CM10	0.984714	7686.69	7680.73	7679.35	7.84396	0.102125	7.33677	5.32258	5.08666	69.331	33
CM10	NaN	7725.3	7725.3	7725.3	1.60078	0.0207213	24.2621	24.2621	1.4873	6.13014	2
CM10	0.918891	7762.69	7761.4	7761.31	2.86362	0.0368956	6.01627	5.94404	1.41602	23.5365	8
CM10	0.48519	7786.44	7786.41	7786.41	3.3275	0.0427348	4.25412	4.22872	1.31941	31.0147	7
CM10	0.512691	7837.49	7839.49	7841.72	7.95698	0.101499	11.8206	6.45587	12.4643	105.445	6
CM10	0.317311	7905.11	7906.54	7906.54	2.02225	0.0255769	8.62723	8.62723	3.71245	43.0317	2
CM10	0.220671	7964.76	7965.96	7968.37	8.53798	0.107181	35.2856	21.3048	28.9977	82.1798	3
CM10	0.410908	8039.87	8036.13	8034.77	4.19467	0.0521977	12.1541	8.89611	10.6162	87.3464	63
CM10	0.76674	8076.2	8077.58	8077.31	3.35154	0.0414919	13.0702	9.56161	10.5469	80.6945	7
CM10	NaN	8100.64	8100.64	8100.64	4.1069	0.0506985	18.8951	18.8951	5.30457	28.0738	2
CM10	NaN	8122.68	8122.68	8122.68	NaN	NaN	20.2585	20.2585	NaN	NaN	1
CM10	NaN	8177.05	8177.05	8177.05	NaN	NaN	5.79774	5.79774	NaN	NaN	1
CM10	0.836493	8204.63	8203.23	8202.92	3.83857	0.0467934	12.3217	7.70658	14.1096	114.51	57
CM10	NaN	8257.53	8257.53	8257.53	2.94909	0.035714	11.4269	11.4269	5.50173	48.1472	2
CM10	0.326764	8316.73	8316	8315.43	3.54522	0.0426313	12.2369	9.12037	8.80034	71.9164	32
CM10	0.317311	8366.83	8366.83	8366.83	0.00858757	0.000102638	14.7284	14.7284	8.10212	55.0102	2
CM10	0.352432	8414.87	8413.83	8413.76	3.96004	0.0470659	8.82406	8.3873	3.49534	39.6114	26
CM10	0.160492	8485.43	8484.5	8485.5	6.62411	0.0780731	13.5597	13.2355	7.95875	58.6941	68
CM10	0.367879	8531.46	8531.54	8531.46	8.18407	0.0959273	6.04459	5.34716	4.79668	79.3548	3
CM10	0.38783	8577.95	8585.3	8586.41	6.44301	0.075047	11.9769	10.4562	7.65423	63.9084	47
CM10	0.205457	8660.56	8665.33	8662.18	11.1129	0.128246	13.5535	11.6998	5.39999	39.842	9
CM10	NaN	8750.98	8752.53	8752.28	1.76869	0.0202077	5.06458	5.28801	0.990073	19.549	4
CM10	0.618097	8794.7	8792.92	8792.65	3.18269	0.036196	19.4004	12.2914	23.373	120.477	25
CM10	NaN	8818.97	8818.97	8818.97	NaN	NaN	13.3766	13.3766	NaN	NaN	1
CM10	0.119393	8879.33	8869.49	8866.53	8.91706	0.100536	9.62005	8.14847	7.0965	73.7678	49
CM10	0.157299	8959.77	8960.42	8959.77	5.28955	0.0590324	6.5696	6.88864	1.01609	15.4665	5
CM10	0.35454	8994.01	8995.94	8999.31	10.2633	0.114088	13.8885	9.41789	10.7835	77.6429	6
CM10	0.56971	9114.7	9105.37	9101.33	14.358	0.157687	9.34696	7.74459	5.73114	61.3155	73
CM10	0.613727	9207.97	9210.58	9210.34	11.6219	0.12618	9.09658	6.95667	5.44615	59.8703	8
CM10	0.480877	9282.95	9286.27	9285.08	3.62068	0.0389896	5.94658	6.27774	2.27062	38.1836	7
CM10	0.367879	9306.81	9305.79	9306.34	1.3803	0.0148327	5.87883	6.22677	3.92333	66.7365	3
CM10	0.50044	9349.68	9348.88	9344.8	8.97225	0.0959714	8.28739	7.21818	5.19756	62.7165	11
CM10	0.606531	9415.76	9415.21	9413.98	8.05166	0.0855176	7.14214	6.00057	4.14955	58.0995	6
CM10	NaN	9465.22	9465.22	9465.22	NaN	NaN	18.2849	18.2849	NaN	NaN	1
CM10	0.437805	9515.82	9520.28	9521.38	6.34064	0.0666014	7.42521	5.7134	3.93448	52.9881	21
CM10	0.0289274	9618.76	9612.58	9599.62	23.2226	0.241585	11.2002	8.63753	7.25937	64.8145	33
CM10	NaN	9680.14	9680.14	9680.14	NaN	NaN	38.8388	38.8388	NaN	NaN	1
CM10	NaN	9751.4	9751.4	9751.4	NaN	NaN	23.643	23.643	NaN	NaN	1
CM10	0.709593	9788.19	9778.87	9776.62	8.7678	0.0896606	23.245	17.2849	18.6911	80.4093	72
CM10	0.367879	9832.34	9831.66	9830.3	7.71891	0.0785108	18.0071	19.2558	2.26059	12.5539	3
CM10	0.201897	9883.98	9886.09	9885.14	5.51167	0.0557518	12.4706	12.8395	7.96694	63.8857	5
CM10	0.317311	9933.44	9933.44	9933.44	2.04648	0.0206019	9.95944	9.95944	3.86369	38.7943	2
CM10	0.0784221	9980.84	9975.62	9975.9	12.7613	0.127925	16.2314	13.4269	8.83697	54.4435	28
CM10	0.509999	10079.5	10075.6	10074.5	4.89774	0.0486101	28.5777	23.7517	19.7749	69.197	26
CM10	0.924113	10117.5	10114.3	10113.5	4.50895	0.0445801	22.8983	14.0695	22.2489	97.164	23
CM10	0.480669	10232.2	10232.9	10231.9	4.39201	0.0429204	26.8933	16.0989	24.3798	90.6538	53
CM10	0.988101	10309.1	10313.4	10317.5	20.8327	0.201996	16.5548	12.2321	11.1606	67.4158	42
CM10	0.654721	10368.6	10366.6	10366.8	6.61734	0.0638335	9.46526	9.13236	1.36759	14.4486	4
CM10	0.810778	10447.6	10447.1	10445.1	15.5774	0.149108	14.906	11.6185	10.6462	71.4223	35
CM10	0.378676	10570.1	10565.8	10557.6	19.6406	0.185889	10.5234	8.72316	7.08645	67.3397	54
CM10	0.65939	10681.8	10679.6	10679.1	5.82526	0.0545458	15.6911	9.26723	17.6139	112.254	14
CM10	0.994662	10806	10797.8	10792.1	14.5452	0.134705	17.3795	9.57948	22.4975	129.449	32
CM10	0.58299	10869.9	10866	10863.5	7.21207	0.0663731	14.4473	10.1359	17.1512	118.716	35
CM10	0.317311	10917.5	10915.6	10915.6	2.6817	0.0245675	6.75712	6.75712	1.45583	21.5452	2
CM10	0.51231	10982.1	10981.9	10981.6	5.81067	0.0529111	17.4089	7.82109	48.0801	276.181	32
CM10	0.0962082	11090.1	11082	11077.4	18.5707	0.167575	16.1641	7.21059	35.4368	219.231	15
CM10	NaN	11178.5	11178.5	11178.5	NaN	NaN	64.8652	64.8652	NaN	NaN	1
CM10	0.317311	11228.7	11232.6	11232.6	5.51115	0.0490637	16.1179	16.1179	0.527173	3.27072	2
CM10	0.367879	11270.8	11267	11268.4	6.88671	0.0611226	25.286	19.8188	14.0089	55.4016	3
CM10	1	11332	11336	11335.1	5.67883	0.0500957	2.70375	2.79527	1.39424	51.567	4
CM10	NaN	11359.7	11359.7	11359.7	NaN	NaN	6.10114	6.10114	NaN	NaN	1
CM10	0.663175	11392.7	11393.7	11395	5.43613	0.0477119	63.9023	18.5575	75.578	118.271	8
CM10	NaN	11436.3	11441	11441	6.72099	0.0587446	4.37734	4.37734	0.0223282	0.510085	2
CM10	NaN	11466.1	11466.1	11466.1	NaN	NaN	4.47753	4.47753	NaN	NaN	1
CM10	0.299781	11499.9	11502.7	11506.5	8.97748	0.0780468	27.7462	16.8098	33.2682	119.902	6
CM10	0.367879	11600.5	11600.3	11599.8	3.9578	0.0341182	30.6578	22.4882	14.6693	47.8484	3
CM10	0.339379	11679.9	11678.4	11676.9	5.79012	0.0495799	13.8747	8.45129	10.0967	72.771	9
CM10	0.730185	11782.6	11762.9	11758.4	16.0219	0.136208	40.5719	21.472	72.9443	179.79	83
CM10	0.317311	11867.1	11867.1	11867.1	2.83135	0.0238588	33.5737	33.5737	1.90559	5.67583	2
CM10	0.25924	11912.7	11913.3	11912.5	6.87005	0.0576668	14.7555	11.9897	10.102	68.4625	4
CM10	0.929502	11984.7	11975.4	11972.6	10.9656	0.0915674	13.8712	7.74477	18.6548	134.486	46
CM10	NaN	12050.6	12050.6	12050.6	9.52468	0.0790388	11.229	11.229	6.52933	58.1468	2
CM10	0.345152	12198.3	12192.3	12186.1	19.269	0.158043	6.73203	3.41948	6.65675	98.8817	12
CM10	0.174853	12300	12306.6	12307.4	13.232	0.107519	7.02033	4.45083	4.91712	70.0412	17
CM10	0.367879	12391.6	12393.8	12398.2	13.7724	0.111123	5.93563	5.95964	2.55648	43.0701	3
CM10	NaN	12438.2	12438.2	12438.2	NaN	NaN	17.2776	17.2776	NaN	NaN	1
CM10	NaN	12480	12480	12480	NaN	NaN	4.17171	4.17171	NaN	NaN	1
CM10	0.317311	12551.1	12551.1	12551.1	4.65801	0.0371124	4.39333	4.39333	2.99962	68.2768	2
CM10	1	12633	12633.4	12634.1	3.69748	0.0292675	8.69223	7.17701	6.50147	74.7964	3
CM10	0.86074	12731.2	12727.1	12727.3	10.186	0.0800337	3.50601	2.04169	3.03928	86.6875	23
CM10	0.507744	12803.7	12801.1	12800.8	11.2771	0.0880947	2.29418	1.47666	1.4821	64.6024	9
CM10	NaN	12965.2	12965.2	12965.2	NaN	NaN	2.87921	2.87921	NaN	NaN	1
CM10	0.317311	13019.6	13018.4	13018.4	1.59556	0.0122562	1.60589	1.60589	0.00131388	0.0818161	2
CM10	0.525913	13112.4	13110.4	13108.7	5.73902	0.0437745	1.17659	1.24139	0.395031	33.5741	12
CM10	NaN	13169.4	13169.4	13169.4	NaN	NaN	7.33081	7.33081	NaN	NaN	1
CM10	0.564718	13293.4	13300.5	13303.4	6.60891	0.0496892	4.45302	3.56226	2.36436	53.0957	7
CM10	0.329502	13373.5	13385.8	13385.8	15.3892	0.114966	6.41443	6.01433	3.80631	59.3398	70
CM10	NaN	13468.8	13468.8	13468.8	NaN	NaN	10.5475	10.5475	NaN	NaN	1
CM10	0.317311	13497.6	13503	13503	7.70476	0.0570595	4.93011	4.93011	1.56944	31.8337	2
CM10	NaN	13552.4	13552.4	13552.4	NaN	NaN	2.9969	2.9969	NaN	NaN	1
CM10	NaN	13687.5	13687.5	13687.5	NaN	NaN	1.80399	1.80399	NaN	NaN	1
CM10	NaN	13719.5	13719.5	13719.5	NaN	NaN	7.01963	7.01963	NaN	NaN	1
CM10	0.791737	13803	13796.7	13790.3	32.6112	0.236369	1.97537	1.54285	1.64042	83.0439	28
CM10	0.905372	13913.6	13912.8	13910.9	9.77879	0.0702861	2.99239	2.43699	2.48041	82.8906	35
CM10	0.295264	14136.2	14143.8	14145.1	10.007	0.0707521	2.26406	2.33254	1.51401	66.8714	41
CM10	NaN	14189.5	14189.5	14189.5	NaN	NaN	2.14621	2.14621	NaN	NaN	1
CM10	0.367879	14226.2	14225.5	14224	5.36482	0.0377127	2.27576	0.960377	2.81625	123.75	3
CM10	0.165299	14274.4	14277.7	14278.1	6.22766	0.0436182	0.7877	0.814084	0.243995	30.9756	5
CM10	0.121335	14346.6	14341.1	14341.4	6.97329	0.0486244	1.03282	1.06893	0.180766	17.5022	4
CM10	0.25924	14388.9	14386.6	14387.2	3.53362	0.0245619	0.773235	0.705053	0.32296	41.7674	4
CM10	NaN	14471.5	14471.5	14471.5	NaN	NaN	15.2503	15.2503	NaN	NaN	1
CM10	NaN	14557.6	14557.6	14557.6	NaN	NaN	4.58942	4.58942	NaN	NaN	1
CM10	0.220671	14590.5	14590.2	14589.7	1.16151	0.0079609	8.17134	10.6294	4.761	58.2646	3
CM10	NaN	14681.6	14681.6	14681.6	NaN	NaN	11.0919	11.0919	NaN	NaN	1
CM10	0.181311	14724.3	14721.2	14719.9	5.5515	0.0377108	4.57421	2.44859	5.82973	127.448	66
CM10	NaN	14769.6	14769.6	14769.6	NaN	NaN	0.869735	0.869735	NaN	NaN	1
CM10	0.654721	14838	14836.4	14835.4	11.6879	0.0787787	3.32941	0.887468	5.29474	159.029	4
CM10	0.867965	14939.9	14939.8	14941.9	14.1739	0.0948735	2.57067	1.83759	1.93667	75.3371	17
CM10	1	15042.3	15046	15044.4	4.68939	0.0311671	1.42327	0.378037	1.83244	128.748	3
CM10	0.312567	15152.9	15148.8	15149.6	22.5413	0.148799	3.41493	1.01538	8.44111	247.182	18
CM10	0.0110687	15310.6	15320.1	15334.3	46.8431	0.305761	4.38233	0.96261	17.1032	390.277	29
CM10	NaN	15485.5	15485.5	15485.5	NaN	NaN	45.0396	45.0396	NaN	NaN	1
CM10	NaN	15742.7	15742.7	15742.7	NaN	NaN	1.7682	1.7682	NaN	NaN	1
CM10	NaN	15786.5	15790.6	15790.6	5.73435	0.036315	12.3751	12.3751	16.959	137.042	2
CM10	0.885631	15864.9	15869.2	15869.5	14.6598	0.0923787	3.49056	1.31863	6.06518	173.76	41
CM10	0.473556	16033.6	16034.6	16027.2	29.4362	0.183579	4.6606	1.92121	8.32836	178.697	12
CM10	0.129812	16155.4	16152.9	16151.7	15.3114	0.0947904	6.70409	1.84992	13.4378	200.442	8
CM10	NaN	16413	16413	16413	NaN	NaN	2.47734	2.47734	NaN	NaN	1
CM10	NaN	16522.6	16522.6	16522.6	NaN	NaN	0.48878	0.48878	NaN	NaN	1
CM10	0.569783	16672.7	16666.6	16667.2	13.1883	0.0791297	13.0094	12.4524	3.64702	28.0338	8
CM10	0.437268	16824.4	16825.3	16824.5	9.84748	0.0585277	16.6203	14.8379	12.0976	72.788	71
CM10	0.469485	16960.1	16968.7	16967.7	10.329	0.0608711	33.313	25.4186	26.9291	80.8366	83
CM10	0.0944964	17122.2	17120.9	17119.3	8.57839	0.0501049	20.1466	17.5635	15.8998	78.9205	53
CM10	0.358144	17164.7	17163.4	17163.6	7.02334	0.0409204	20.6175	17.601	12.6721	61.4629	60
CM10	0.163751	17320.2	17317.6	17317	8.34094	0.0481645	12.6617	10.7754	9.09208	71.8075	72
CM10	NaN	17382.4	17382.4	17382.4	NaN	NaN	4.68113	4.68113	NaN	NaN	1
CM10	NaN	17425	17425	17425	NaN	NaN	2.69923	2.69923	NaN	NaN	1
CM10	0.132152	17500.5	17501.9	17501.6	10.5752	0.0604232	9.49565	8.15903	6.42858	67.7003	70
CM10	0.317311	17576.8	17580	17580	4.49277	0.0255561	2.43928	2.43928	0.0203086	0.832565	2
CM10	0.411601	17650.4	17638.7	17637.4	11.1704	0.0633286	9.20626	7.87085	5.12025	55.6171	42
CM10	0.179713	17754.2	17749.8	17750.8	6.04243	0.0340422	5.32134	3.61558	4.99103	93.7928	4
CM10	0.887766	17852.9	17843	17838.3	12.9848	0.0727727	6.3237	5.08154	3.35338	53.0289	6
CM10	0.498362	17959.5	17968.1	17979.6	23.0346	0.128197	4.43152	3.59767	3.02144	68.1807	7
CM10	0.333965	18111.6	18112	18111.5	11.8444	0.0653951	3.77562	3.36728	2.58549	68.4785	10
CM10	0.631715	18178.6	18173.8	18167.6	17.225	0.0947796	3.78349	2.97399	3.59936	95.1334	17
CM10	0.326207	18269.1	18268.7	18267.9	7.4625	0.0408486	5.46016	4.3693	3.66397	67.1037	8
CM10	0.220671	18321.6	18321	18320	1.81913	0.00992918	8.80348	10.6631	6.08895	69.1652	3
CM10	0.22313	18439.6	18441.6	18451.7	16.8939	0.091608	4.55263	3.93226	2.16694	47.5974	5
CM10	NaN	18562.7	18562.7	18562.7	NaN	NaN	1.47118	1.47118	NaN	NaN	1
CM10	NaN	18613.5	18613.5	18613.5	5.08303	0.0273083	2.47124	2.47124	0.865031	35.0039	2
CM10	0.0791821	18751.1	18741.7	18727.3	31.0833	0.165851	2.09706	1.40792	1.84173	87.8247	18
CM10	0.392615	19018.6	19019.8	19019.2	8.31938	0.0437406	1.80162	1.69106	1.13553	63.0284	12
CM10	0.905136	19150.3	19135.7	19134	10.8685	0.0567967	1.96076	1.7294	1.63714	83.495	29
CM10	0.616674	19333.1	19324.5	19322.4	21.2984	0.110215	1.1614	0.754591	0.920404	79.2494	16
CM10	0.317311	19747.7	19753.1	19753.1	7.64278	0.0386915	2.48151	2.48151	0.771992	31.1098	2
CM10	0.818731	19827	19823.9	19818.5	13.093	0.0660462	0.294829	0.242521	0.164054	55.6438	5
CM10	0.391625	19914.5	19912.1	19911.9	14.9827	0.0752445	0.549838	0.647712	0.320588	58.306	4
CM10	0.536027	19974.5	19976.4	19975.2	7.90078	0.0395505	0.707251	0.392397	0.781536	110.503	14
CM10	0.317311	20218.1	20218.1	20218.1	26.6435	0.13178	0.668766	0.668766	0.550636	82.3361	2
CM10	0.795566	20592.5	20596	20595.3	11.7894	0.0572414	2.81368	2.31505	2.56192	91.0522	77
CM10	0.743459	20806.1	20804.6	20805.3	11.9172	0.0572818	1.53456	1.38366	0.978084	63.737	17
CM10	0.724922	20980.4	20982.1	20979.1	12.5665	0.0598915	1.72116	0.905213	3.12057	181.306	16
CM10	0.251813	21108.9	21112.1	21113.8	13.9959	0.0662934	0.749296	0.536861	0.489195	65.2872	10
CM10	0.305306	21216.4	21210.5	21206.9	18.9919	0.0895401	1.00279	0.75239	1.00773	100.493	12
CM10	0.506837	21364.9	21358.2	21358	13.4983	0.0631993	0.799617	0.598374	0.538875	67.3916	20
CM10	NaN	21955.7	21955.7	21955.7	NaN	NaN	2.18358	2.18358	NaN	NaN	1
CM10	NaN	22046.1	22046.1	22046.1	NaN	NaN	2.13967	2.13967	NaN	NaN	1
CM10	NaN	22151.4	22151.4	22151.4	NaN	NaN	1.85474	1.85474	NaN	NaN	1
CM10	0.618471	22355.1	22333.8	22325.1	42.9814	0.19245	1.71699	1.31478	1.31492	76.583	42
CM10	0.220671	22487.3	22490.2	22496	26.7515	0.118947	2.07802	1.54319	1.30564	62.8311	3
CM10	NaN	22800.4	22800.4	22800.4	NaN	NaN	3.27505	3.27505	NaN	NaN	1
CM10	NaN	22974.3	22974.3	22974.3	NaN	NaN	0.946526	0.946526	NaN	NaN	1
CM10	0.179713	23523.5	23525.2	23526.9	10.3228	0.0438797	7.67825	1.77373	12.6283	164.468	4
CM10	0.0898867	23650.4	23628.2	23617.8	42.6753	0.180612	6.1249	3.78482	6.03892	98.5962	73
CM10	NaN	23925	23925	23925	NaN	NaN	8.16542	8.16542	NaN	NaN	1
CM10	0.922787	24100.8	24103.9	24109.9	19.8041	0.0821616	4.20614	1.97649	3.78153	89.9048	7
CM10	0.40657	24350.5	24351.7	24352.9	27.5252	0.113032	1.10954	0.766427	1.19099	107.34	4
CM10	0.601139	24582.4	24577	24574.8	13.4795	0.0548459	0.761956	0.584571	0.548896	72.0377	7
IMAC30	0.125945	1728.26	1727.86	1727.38	1.36726	0.0791299	17.9206	12.2571	29.0399	162.048	25
IMAC30	0.957647	1748.46	1749.28	1749.65	1.75087	0.100091	22.1626	14.7164	28.7781	129.85	38
IMAC30	0.664572	1890.19	1889.7	1889.36	1.46903	0.0777389	9.42114	8.61303	4.33205	45.9822	18
IMAC30	0.0443614	2019.02	2017.95	2017.64	1.8163	0.0900071	103.429	19.1205	152.026	146.987	12
IMAC30	0.147164	2098.14	2097.66	2096.98	1.77459	0.0845987	14.8709	9.76822	14.1984	95.478	13
IMAC30	0.241299	2199.39	2199.51	2199.56	1.2494	0.0568035	51.6535	39.6779	42.7451	82.7535	69
IMAC30	0.860708	2270.63	2269.38	2267.97	4.35092	0.191723	19.6112	19.4126	14.3166	73.0021	11
IMAC30	0.140491	2344.8	2345.19	2345.53	1.82298	0.0777327	21.1314	10.4041	29.4189	139.219	25
IMAC30	0.02732	2382.82	2382.46	2382.36	1.38005	0.0579255	27.9577	26.2533	11.4781	41.0551	61
IMAC30	0.0421877	2444.75	2444.47	2444.22	1.7655	0.0722244	121.755	59.6018	137.671	113.072	72
IMAC30	0.000728193	2577	2578.07	2580.83	6.23332	0.241783	31.9121	22.2771	26.8868	84.2529	56
IMAC30	0.0624697	2661.99	2665.1	2667.85	7.58017	0.284424	23.8716	18.6102	19.1535	80.2355	62
IMAC30	0.0265419	2803.79	2799.76	2799.05	2.65676	0.0948923	160.681	87.0472	182.291	113.45	77
IMAC30	0.160175	2950.2	2951.6	2951.53	3.34288	0.113257	17.2911	12.46	13.4259	77.6461	38
IMAC30	0.0384117	3012.13	3007.64	3005.5	4.85837	0.161534	25.1529	21.7411	16.8838	67.1249	44
IMAC30	0.210929	3092.68	3096.87	3097.75	3.69255	0.119235	15.7453	13.2572	8.85497	56.2387	33
IMAC30	0.43399	3380.61	3380.97	3380.93	1.41776	0.0419337	64.5664	10.2132	106.762	165.352	21
IMAC30	0.654136	3460.32	3461.77	3464.7	6.59953	0.19064	44.7927	15.478	93.803	209.416	59
IMAC30	0.401547	3499.52	3498.19	3497.63	3.47033	0.0992036	51.927	19.8523	77.1633	148.599	20
IMAC30	0.433915	3715.67	3715.72	3715.57	2.21163	0.0595209	58.8654	31.7719	71.5884	121.614	49
IMAC30	0.942203	3844.59	3843.48	3842.72	2.49004	0.064786	16.0112	10.478	13.5789	84.8089	14
IMAC30	0.0815806	3917.31	3919.51	3921.64	8.40079	0.214332	19.5107	14.8883	15.7041	80.4898	40
IMAC30	0.578728	4023.18	4022.05	4020.94	4.36186	0.108448	19.2027	14.5977	15.2972	79.6617	56
IMAC30	0.787459	4136.08	4136.23	4134.14	6.75324	0.16327	23.243	14.3949	19.4383	83.6305	18
IMAC30	0.812439	4259.18	4259.12	4259.23	2.41833	0.0567801	36.085	18.5907	34.7785	96.3793	19
IMAC30	0.433657	4374.03	4375.54	4376.17	3.04259	0.0695362	28.2944	24.1382	17.8747	63.174	36
IMAC30	0.0929366	4484.89	4489.89	4490.31	4.03484	0.089865	24.3188	21.9284	10.0791	41.4459	27
IMAC30	0.152846	4549.52	4548.37	4547.86	2.23521	0.0491432	52.4106	33.94	53.0121	101.148	62
IMAC30	0.0217085	4640.76	4639.07	4637.13	5.44666	0.117409	58.8149	47.3621	38.4046	65.2974	66
IMAC30	0.0346658	4763.16	4762.54	4762.06	1.52893	0.0321033	464.529	493.714	280.853	60.4597	82
IMAC30	0.0633297	4967.6	4970.36	4970.79	4.00354	0.0805482	53.6114	53.5718	25.754	48.0383	73
IMAC30	0.800232	5081.07	5081.1	5081.2	1.49799	0.0294817	165.501	95.3875	180.357	108.976	22
IMAC30	0.134882	5291.03	5290.31	5289.76	1.63105	0.0308309	34.1126	32.2202	19.054	55.8563	10
IMAC30	0.978716	5311.13	5311.33	5311.51	1.89424	0.0356641	30.4346	25.6995	21.3734	70.2274	20
IMAC30	0.497778	5417.28	5412.24	5411.93	10.1171	0.186929	23.4619	19.7432	13.7262	58.5042	49
IMAC30	0.0149493	5518.58	5513.65	5512.48	4.27127	0.0774672	48.6897	40.8753	43.0434	88.4034	43
IMAC30	0.121365	5632.67	5629.85	5631.05	7.76136	0.137861	19.1167	17.5062	10.6485	55.7024	34
IMAC30	0.152044	5710.38	5706.37	5705.29	4.36095	0.0764226	21.4063	18.7803	13.16	61.4773	19
IMAC30	0.400302	5818.64	5817.67	5817.68	1.79862	0.0309165	38.0501	26.8008	34.3248	90.2093	51
IMAC30	0.863753	6198.68	6199.94	6200.04	3.69229	0.0595537	28.5595	20.4644	29.4046	102.959	27
IMAC30	0.655632	6286.15	6283.46	6282.17	4.98328	0.079308	20.5473	17.1454	13.3146	64.7997	35
IMAC30	0.306319	6363.7	6358.04	6354.63	7.1118	0.111855	27.3138	15.3124	27.6559	101.252	72
IMAC30	0.719713	6458.92	6456.01	6453.83	8.47698	0.131304	19.7997	13.2157	17.5199	88.4853	55
IMAC30	0.119409	7070.57	7073.16	7072.9	18.6861	0.264183	5.41816	3.81507	3.86119	71.2639	29
IMAC30	0.732513	7307.58	7315.01	7319.15	10.3959	0.142117	4.07954	3.21172	3.03856	74.483	31
IMAC30	0.112779	7360.98	7361.82	7361.73	9.35969	0.127138	8.23085	6.32734	5.86929	71.3084	16
IMAC30	0.291177	7477.78	7477.23	7478.61	8.87513	0.118695	15.18	9.67235	14.5193	95.6479	71
IMAC30	0.460294	7559.98	7557.95	7556.42	6.2909	0.0832356	8.49748	5.91647	7.00254	82.4072	21
IMAC30	0.302769	7696.74	7681.03	7678.87	7.64521	0.0995337	33.3902	23.3	32.3194	96.7931	79
IMAC30	0.12161	7771.31	7764.67	7760.49	11.4726	0.147754	17.9883	12.8751	15.2515	84.7856	65
IMAC30	0.267274	7846.31	7841.94	7840.71	6.46304	0.0824164	16.6017	13.2318	13.3413	80.3608	41
IMAC30	0.134444	7902.91	7899.62	7902.6	16.8571	0.213392	17.3025	14.9132	9.94864	57.4981	30
IMAC30	0.632566	8036.75	8032.23	8031.23	3.57124	0.0444614	64.2703	60.2541	36.0577	56.1032	80
IMAC30	0.611132	8253.15	8244.01	8242.74	6.44931	0.0782302	14.6771	12.8462	7.5371	51.3529	73
IMAC30	0.744275	9117.74	9114.19	9113.13	13.9646	0.153218	6.94438	5.26257	7.50019	108.004	28
IMAC30	0.396527	9184.88	9180.48	9180.15	4.78111	0.0520791	12.273	9.30289	8.63011	70.318	46
IMAC30	0.449024	9337.27	9336.37	9336.08	2.73983	0.0293458	5.79894	5.18901	3.34986	57.7668	60
IMAC30	0.392097	9521.65	9520.14	9519.83	3.18975	0.0335053	4.61218	3.94318	2.09819	45.4923	36
IMAC30	0.133008	9664.59	9654.63	9652.52	8.56783	0.0887432	7.17407	5.58757	5.4033	75.3171	28
IMAC30	0.540468	9796.05	9786.39	9782.54	14.0232	0.143293	13.7283	13.1828	6.67209	48.6009	35
IMAC30	0.180281	9846.57	9851.16	9853.13	7.09452	0.0720171	28.8328	24.0054	17.3625	60.2179	46
IMAC30	0.211125	9893.64	9892.66	9891.6	4.72114	0.0477237	14.727	15.2214	6.29742	42.761	27
IMAC30	0.459327	9964.73	9962.15	9960.15	6.14362	0.0616696	13.3387	12.9375	6.095	45.694	25
IMAC30	0.194985	10014.4	10018.8	10020.4	6.52245	0.0651022	13.92	12.8689	7.55793	54.2953	18
IMAC30	0.933212	10229.9	10227.4	10226.6	4.15574	0.0406333	6.07018	5.85023	3.29463	54.2756	28
IMAC30	0.920884	10467.2	10464.4	10463	5.60824	0.0535936	10.6451	4.44652	14.1191	132.634	10
IMAC30	0.228297	10675.4	10673.4	10673.1	5.07187	0.0475189	10.8228	3.17903	15.3883	142.185	12
IMAC30	0.552135	10862.4	10863.3	10864.9	5.58553	0.0514163	47.1235	5.71263	74.1797	157.416	13
IMAC30	0.850873	11093.8	11096.8	11106.3	20.5761	0.185424	11.2703	2.59855	14.7541	130.912	16
IMAC30	0.593346	11333.7	11335.4	11336.4	9.11435	0.0804059	9.36415	2.46515	20.096	214.605	12
IMAC30	0.955607	11759.4	11755.6	11754.6	5.97483	0.0508254	24.9088	8.13451	60.5604	243.129	72
IMAC30	0.745395	11974.2	11972.5	11970.2	11.4872	0.0959467	7.24837	2.88955	14.3761	198.335	48
IMAC30	0.336647	12195.8	12186	12179.6	17.5782	0.144249	4.46081	2.15533	5.04906	113.187	18
IMAC30	0.955547	12795.4	12794.1	12795.1	9.49249	0.0741942	2.23762	0.924615	4.05151	181.063	41
IMAC30	0.269891	13229.5	13218.1	13214.6	9.88558	0.0747884	2.17787	1.33827	2.54348	116.787	13
IMAC30	0.759129	13421.2	13414.5	13422.8	24.22	0.180551	3.73891	0.867511	8.15747	218.178	25
IMAC30	0.884897	13765.7	13760.5	13759.3	6.06052	0.0440428	0.968236	0.626734	1.01934	105.278	15
IMAC30	0.910446	13827.8	13824.1	13820	12.1925	0.0881974	2.67653	0.965392	4.78383	178.732	14
IMAC30	0.334235	13917.3	13915.4	13916.6	15.301	0.109957	1.88528	0.767169	2.62622	139.301	18
IMAC30	0.407996	14132.8	14138.3	14140	8.46735	0.0598894	0.915222	0.735492	0.746515	81.5665	36
IMAC30	0.497986	15333.5	15337.3	15341.9	32.068	0.209085	2.11745	0.453877	7.22745	341.328	32
IMAC30	0.255471	16982.3	16979.4	16975.4	21.4858	0.12654	0.565069	0.335262	0.668126	118.238	19
IMAC30	0.791656	18185.1	18187.8	18191.7	29.952	0.164682	0.281591	0.194771	0.282173	100.207	34
IMAC30	0.754059	19147	19143.1	19138.1	15.1192	0.07898	0.317587	0.246649	0.179309	56.46	13
IMAC30	0.672951	19610.1	19612.6	19607.1	32.6595	0.166524	0.247594	0.190925	0.191215	77.2296	18
IMAC30	0.889815	19818.8	19803.9	19801.7	54.446	0.274925	0.266896	0.225378	0.164274	61.5496	38
IMAC30	0.208012	20597.7	20593.4	20591.1	13.8113	0.0670667	0.333051	0.296284	0.20599	61.8494	40
IMAC30	0.674315	21250.8	21243.6	21244.7	46.5477	0.219114	0.466192	0.325079	0.455148	97.6311	27
IMAC30	0.186467	23580.8	23582.7	23578.6	53.8341	0.228278	0.733732	0.439153	1.12261	153	31
IMAC30	0.38419	24161.8	24159.2	24157.1	26.0396	0.107783	0.423257	0.367829	0.19188	45.3341	25
IMAC30	0.322619	24369.7	24368	24369	29.1821	0.119756	0.483808	0.420092	0.265276	54.8309	33
IMAC30	0.429882	24598.3	24591	24588.5	27.2416	0.110779	0.448728	0.33425	0.29455	65.6411	27
